# Supplementary material for: The Complete Genome and Physiological Analysis of the Eurythermal Firmicute Exiguobacterium chiriqhucha Strain RW2 Isolated From a Freshwater Microbialite, Widely Adaptable to Broad Thermal, pH, and Salinity Ranges
Source: Front Microbiol. 2019 Jan 8;9:3189. doi: 10.3389/fmicb.2018.03189 (PMC6331483; doi:10.3389/fmicb.2018.03189)
Supplement: Table S1 — Complete genomes of Exiguobacterium published (as of July 2018). [file Table_1.xlsx]

## Sheet: Sheet1
Exiguobacterium strain	Genome publication - author/year
E. sibiricum 255-15T	Rodrigues et al., 2008
E. sp. AT1b	Vishnivetskaya et al., 2011
E. antarcticum B7	Carneiro et al., 2012
E. sp. ZWU0009	Semova et al., 2012
E. sp MH3	Tang et al., 2013
E. acetylicum DSM20416T	Vishnivetskaya et al., 2014
E. antarcticum DSM14480T	Vishnivetskaya et al., 2014
E. aurantiacum DSM6208T	Vishnivetskaya et al., 2014
E. marinum DSM16307T	Vishnivetskaya et al., 2014
E. oxidotolerans JCM12280T	Vishnivetskaya et al., 2014
E. sibiricum 7-3	Vishnivetskaya et al., 2014
E. undae DSM14481T	Vishnivetskaya et al., 2014
E. undae 190-11	Vishnivetskaya et al., 2014
E. sp. GIC31	Vishnivetskaya et al., 2014
E. sp. NG55	Vishnivetskaya et al., 2014
E. sp. N139	Gutiérrez-Preciado et al., 2017
