# Supplementary material for: The Complete Genome and Physiological Analysis of the Eurythermal Firmicute Exiguobacterium chiriqhucha Strain RW2 Isolated From a Freshwater Microbialite, Widely Adaptable to Broad Thermal, pH, and Salinity Ranges
Source: Front Microbiol. 2019 Jan 8;9:3189. doi: 10.3389/fmicb.2018.03189 (PMC6331483; doi:10.3389/fmicb.2018.03189)
Supplement: Table S2 — Antibiotic susceptibility for selected strains Exiguobacterium. Resistant (+), sensitive (-), data not available (NA). Additional data are from 1Chaturvedi et al. (2008). All growth measurements for strain RW2 were taken after 24 h. This for standard growth conditions for strain RW2 [M-agar, 30°C, 1% NaCl (w/v) and pH 7, on 1.5% (w/v) agar] all in triplicate. [file Table_2.xlsx]

## Sheet: Sheet1
Antibiotic	Disc Content	Strain RW2	E. antarcticum1 DSM14480	E. sibiricum1 DSM17290	E. undae1 DSM14481	E. indicum1 DSM15368	E. acetylicum1 DSM20416	E. soli1 DSM22015
Sulfamethoxazole/Trimethoprim	24/1.25μg	-	NA	NA	NA	NA	NA	NA
Sulfamethoxazole	50 μg	-	-	+	+	+	-	+
Clindamycin*	25 μg	-	-	-	-	+	+	+
Penicillin	10 IU	-	NA	NA	NA	NA	NA	NA
Rifampin	5 μg	-	NA	NA	NA	NA	NA	NA
Polymyxin	300 IU	-	NA	NA	NA	NA	NA	NA
Cefixime	5 μg	-	NA	NA	NA	NA	NA	NA
Sulfisoxazole	300 μg	+	NA	NA	NA	NA	NA	NA
Oxacillin	1 µg	-	NA	NA	NA	NA	NA	NA
Tetracycline	30 μg	-	NA	NA	NA	NA	NA	NA
Trimethoprim	5 μg	-	NA	NA	NA	NA	NA	NA
Tobramycin	10 μg	-	NA	NA	NA	NA	NA	NA
Vancomycin	30 μg	-	NA	NA	NA	NA	NA	NA
Streptomycin	10 μg	-	NA	NA	NA	NA	NA	NA
